# Supplementary material for: Therapeutic Mechanisms of Berberine to Improve the Intestinal Barrier Function via Modulating Gut Microbiota, TLR4/NF-κ B/MTORC Pathway and Autophagy in Cats
Source: PubMed Central journal article supplement (PMC9354406; doi:10.3389/fmicb.2022.961885), 2022-07-22
Supplement: Data_Sheet_5.pdf [file Data_Sheet_5.pdf]

## cycling conditions

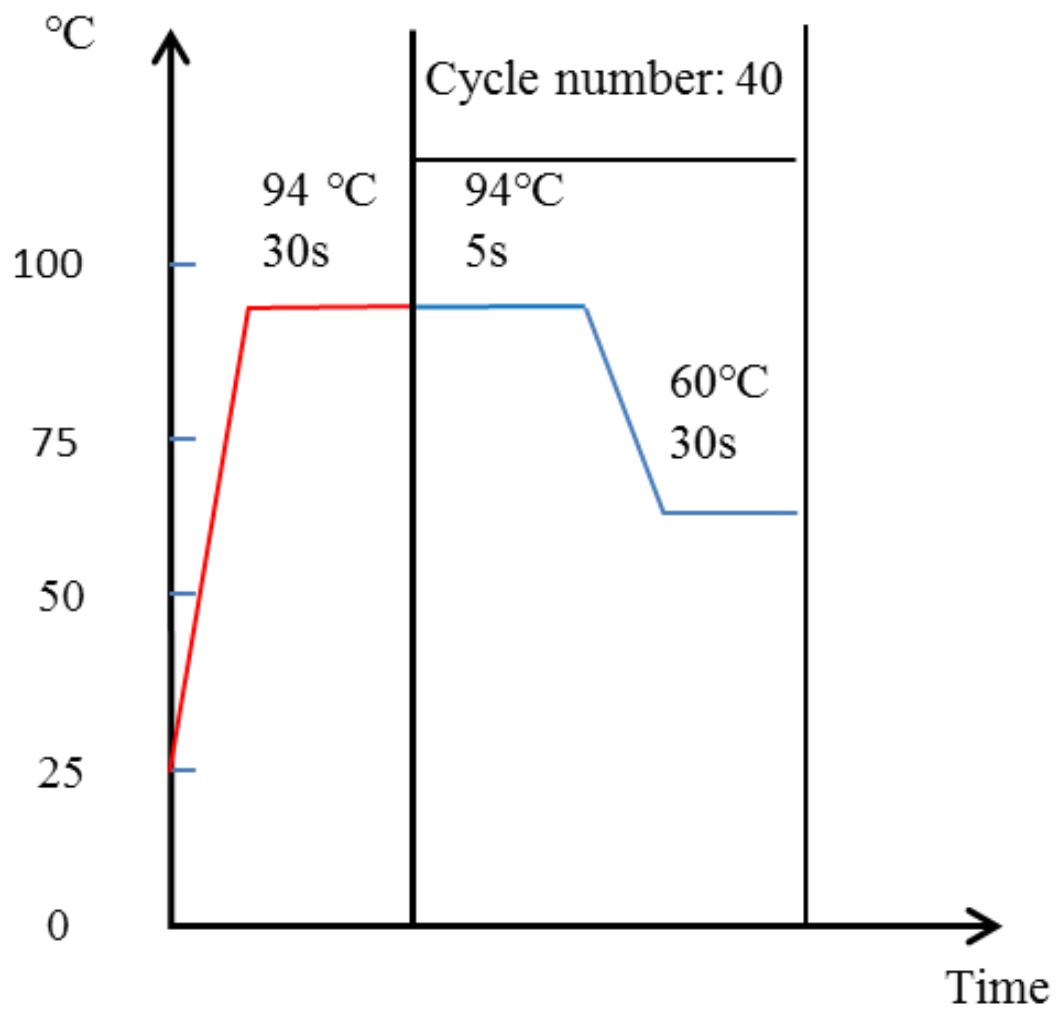

**Supplementary Figure 2.** The cycling conditions of RT-qPCR. Pre-denaturation at 94 °C for 30 s followed by 40 cycles of 94 °C for 5 s and annealing at 60 °C for 30 s.
