# Supplementary material for: Therapeutic Mechanisms of Berberine to Improve the Intestinal Barrier Function via Modulating Gut Microbiota, TLR4/NF-κ B/MTORC Pathway and Autophagy in Cats
Source: PubMed Central journal article supplement (PMC9354406; doi:10.3389/fmicb.2022.961885), 2022-07-22
Supplement: Data_Sheet_7.pdf [file Data_Sheet_7.pdf]

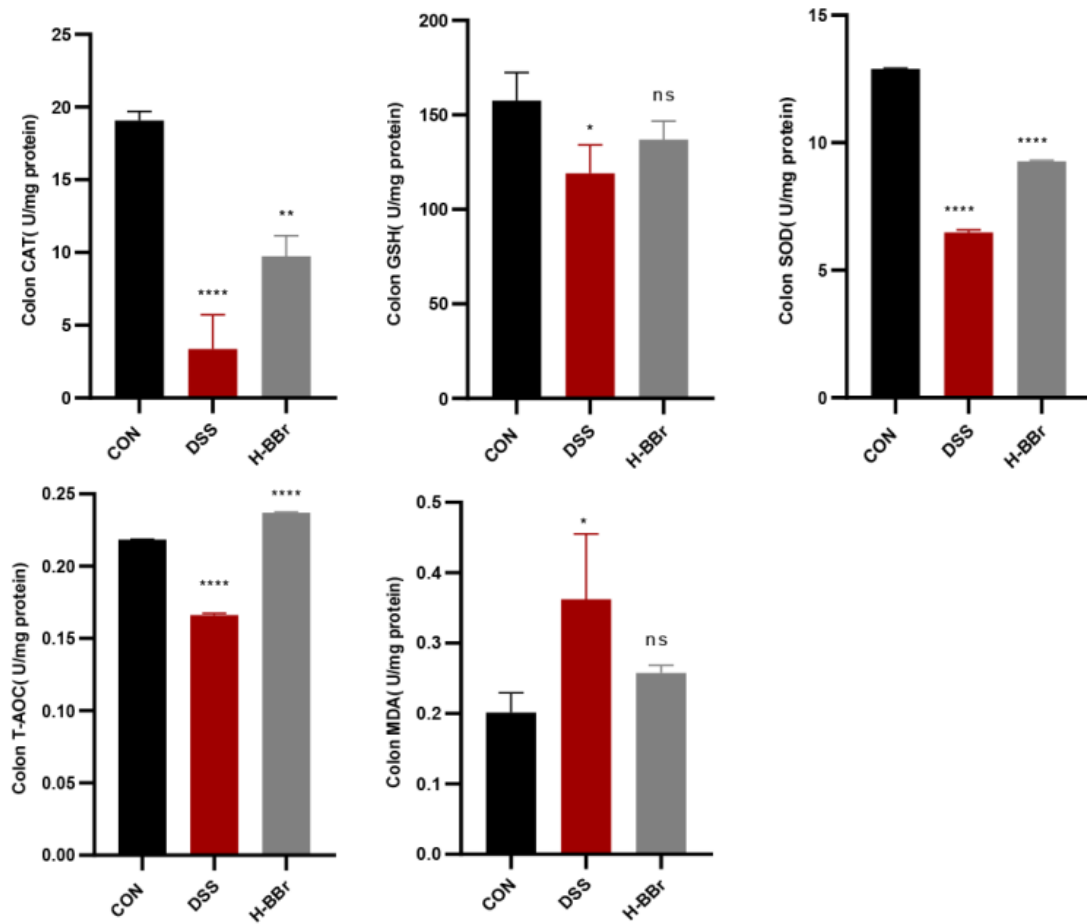

**Supplementary Figure 4.** BBr inhibited the oxidative stress responses in DSS-induced colitis. Colonic level of T-AOC, GSH, CAT, SOD, and MDA. All data present as mean SD; n=3 per group. \*P<0.05, \*\*P<0.01, and \*\*\*P<0.001, \*\*\*\*P<0.0001, compared with the CON group.
